# Supplementary material for: High Throughput Sequencing of Entamoeba 27nt Small RNA Population Reveals Role in Permanent Gene Silencing But No Effect on Regulating Gene Expression Changes during Stage Conversion, Oxidative, or Heat Shock Stress
Source: PLoS One. 2015 Aug 6;10(8):e0134481. doi: 10.1371/journal.pone.0134481 (PMC4527709; doi:10.1371/journal.pone.0134481)
Supplement: S1 Table — Mapping of E. invadens small RNAs to transposons and repetitive elements. Unique reads from E. invadens trophozoites, early cysts (24h), mature cysts (72h) and excysting cells (8h), after removal of tRNA and rRNA mapped reads, were aligned to each type of transposable and repetitive element found in the E. invadens genome. Total read number, percent of unique reads, and percent of the E. invadens genome that each element represents (adapted from [30]) are shown. (XLSX) [file pone.0134481.s006.xlsx]

## Sheet: Sheet1
	Trophozoite	% of unique reads	Early cyst (24h)	% of unique reads	Mature cyst (72h)	% of unique reads	Excystation (8h)	% of unique reads
Ei_DDE	22965	0.0865232	60523	0.0755377	51214	0.076709	44967	0.0788524
Ei_ERE	835	0.00314596	2487	0.00310398	1945	0.00291325	1786	0.00313186
Ei_hAT	3156	0.0118906	8045	0.0100408	6932	0.0103828	5992	0.0105073
Ei_LINE	1619	0.00609977	4658	0.00581357	4154	0.00622192	3594	0.0063023
Ei_mariner	9624	0.0362595	25877	0.0322966	21869	0.0327557	18928	0.0331914
Ei_MuDR	5667	0.0213511	14901	0.0185977	12805	0.0191795	10993	0.0192769
Ei_piggyBac	563	0.00212117	1403	0.00175106	1302	0.00195015	1069	0.00187456
Ei_Polinton	947	0.00356793	2483	0.00309899	2279	0.00341352	1767	0.00309854
ALL	45376	0.170959	120377	0.15024	102500	0.153526	89096	0.156235
